# Supplementary material
Source: PubMed Central journal article supplement (PMC6355502)
Supplement: 2018_202598-Disclosures_and_Contributions.pdf [file 2018_202598-Disclosures_and_Contributions.pdf]

Haematologica  
HAEMATOL/2018/202598  
Version 3

Unrelated cord blood transplantation and post-transplant  
cyclophosphamide

Andrea Bacigalupo, Simona Sica, Luca Laurenti, Federica Sorà,  
Sabrina Giammarco, Elisabetta Metafuni, Idanna Innocenti, Francesco  
Autore, Luciana Teofili, Maria Bianchi, and Patrizia Chiusolo

Disclosures: The Authors declare no conflict of interest

Contributions: AB designed the protocol and wrote the manuscript; PC, MB and LT provided the search of the CB unit and the procurement of the cells; SS, LL, FS, SG, EM, II, FA, SS provided clinical care;
